# Supplementary material
Source: PubMed Central journal article supplement (PMC8571767)
Supplement: ONCO-26-e1982-s001.pdf [file ONCO-26-e1982-s001.pdf]

Supplemental Appendix for:  
Implementation of an embedded in-clinic genetic testing station to optimize germline testing for patients with pancreatic adenocarcinoma  
Evan J Walker et al.

## **Supplemental Materials**

### **PDAC Nurse Navigator GTS Introduction Script**

See attached document

## Germline Genetic Testing Panel

Germline genetic testing was completed with a custom Invitae 133-gene panel.

The following genes were evaluated for sequence changes and exonic deletions/duplications, except where noted by the asterisk (see below): *AKT1*, *ALK*, *APC*, *ATM*, *AXIN2*, *BAP1*, *BARD1*, *BLM*, *BMPRIA*, *BRCA1*, *BRCA2*, *BRIP1*, *BUB1B*, *CASR*, *CDC73*, *CDH1*, *CDK4*, *CDKN1B*, *CDKN1C*, *CDKN2A (p14ARF)*, *CDKN2A (p16INK4a)*, *CEBPA*, *CEP57*, *CFTR*, *CHEK2*, *CTC1*, *CTNNA1*, *CTRC*, *DICER1*, *DIS3L2*, *DKC1*, *EGFR\**, *EGLN1*, *ENG*, *EPCAM\**, *ERCC4*, *EZH2*, *FAM175A*, *FANCA*, *FANCB*, *FANCC*, *FANCD2\**, *FANCE*, *FANCF*, *FANCG*, *FANCI*, *FANCL*, *FANCM*, *FH*, *FLCN*, *GALNT12*, *GATA1*, *GATA2*, *GPC3*, *GREM1\**, *HOXB13\**, *HRAS*, *KIF1B*, *KIT*, *MAX*, *MC1R*, *MEN1*, *MET*, *MITF\**, *MLH1*, *MLH3*, *MRE11*, *MSH2*, *MSH3*, *MSH6*, *MUTYH*, *NBN*, *NF1*, *NF2*, *NHP2*, *NOPI10*, *NTHL1\**, *PALB2*, *PALLD*, *PDGFRA*, *PHOX2B\**, *PIK3CA*, *PMS2*, *POLD1*, *POLE*, *POT1*, *PRKAR1A*, *PRSS1*, *PTCH1*, *PTCH2*, *PTEN*, *RAD50*, *RAD51C*, *RAD51D*, *RBI*, *RECQL4*, *RET*, *RINT1*, *RPL11*, *RPL26*, *RPL35A*, *RPL5*, *RPS10*, *RPS19*, *RPS20*, *RPS24*, *RPS26*, *RPS7*, *RUNX1*, *SDHA*, *SDHAF2*, *SDHB*, *SDHC*, *SDHD*, *SLX4*, *SMAD4*, *SMARCA4*, *SMARCB1*, *SMARCE1*, *SPINK1*, *SPRED1*, *STK11*, *SUFU*, *TERC*, *TERT*, *TINF2*, *TMEM127*, *TP53*, *TSC1*, *TSC2*, *VHL*, *WRN\**, *WT1*, *XRCC2*

### \*Limitations:

- *EGFR*: c.2369C>T (p.Thr790Met), c.2327G>A (p.Arg776His), c.2527G>A (p.Val843Ile) variants only
- *EPCAM*: Deletion/duplication testing only
- *FANCD2*: Deletion/duplication analysis not offered for exons 14-17
- *GREM1*: Promoter region deletion/duplication testing only
- *HOXB13*: c.251G>A (p.Gly84Glu) variant only
- *MITF*: c.952G>A (p.Glu318Lys) variant only
- *NTHL1*: Deletion/duplication analysis not offered
- *PHOX2B*: Alanine repeat numbers for the commonly-expanded region in exon 3 not determined
- *WRN*: Deletion/duplication analysis not offered for exons 10 or 11
